**CORRECTION**

# Canonical Wnt signalling regulates epithelial patterning by modulating levels of laminin in zebrafish appendages

Monica Nagendran, Prateek Arora, Payal Gori, Aditya Mulay, Shinjini Ray, Tressa Jacob and Mahendra Sonawane

There was an error published in *Development* 142, 320-330.

Fig. 1F was inadvertently prepared using results from the wrong dataset. The correct figure appears below but this error does not affect the conclusions of the paper.

The authors apologise to readers for this mistake.

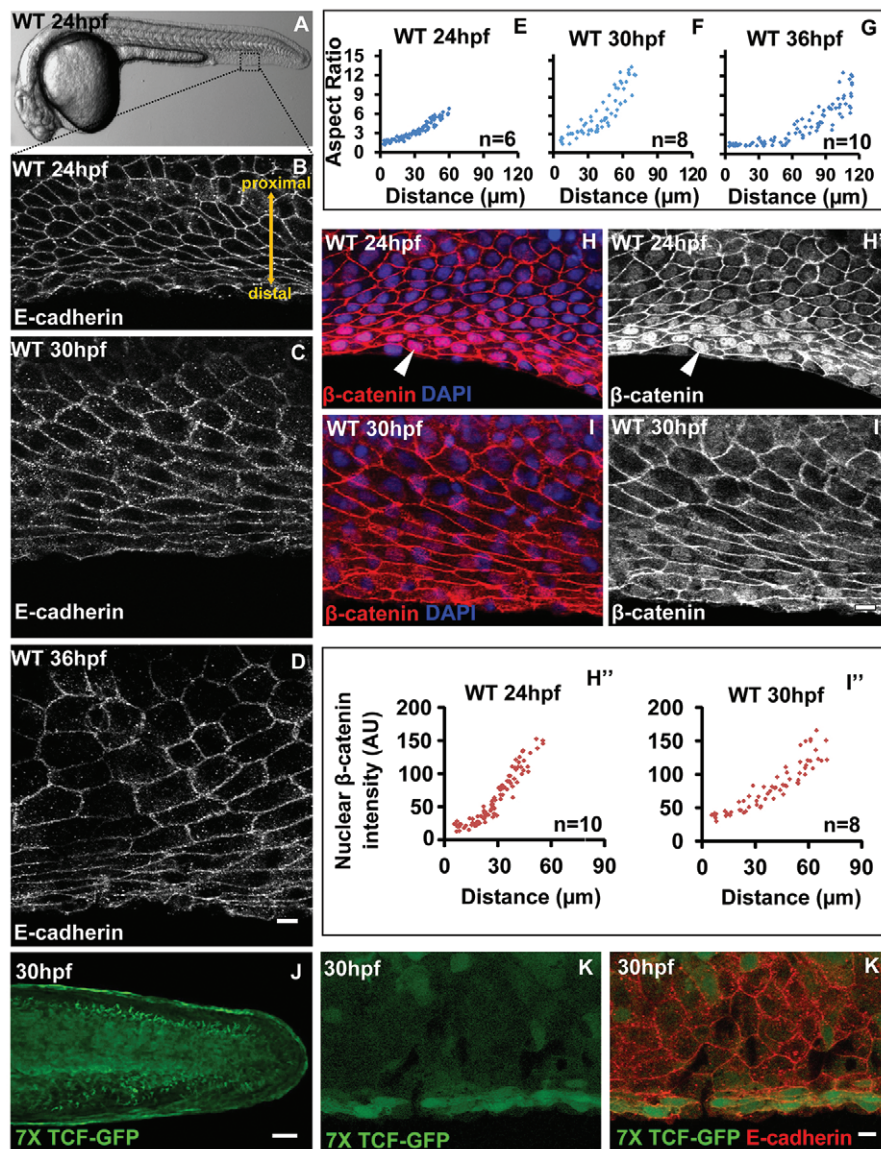

Source: https://cob.silverchair.com/dev/article-pdf/142/11/2080/1693366/dev125849.pdf
